# Supplementary material
Source: PubMed Central journal article supplement (PMC6951840)
Supplement: mmc1.pdf [file mmc1.pdf]

YMTHE, Volume 28

## Supplemental Information

### Long-Term Structural Outcomes of Late-Stage *RPE65* Gene Therapy

**Kristin L. Gardiner, Artur V. Cideciyan, Malgorzata Swider, Valérie L. Dufour, Alexander Sumaroka, András M. Komáromy, William W. Hauswirth, Simone Iwabe, Samuel G. Jacobson, William A. Beltran, and Gustavo D. Aguirre**

Supplemental Fig. 1

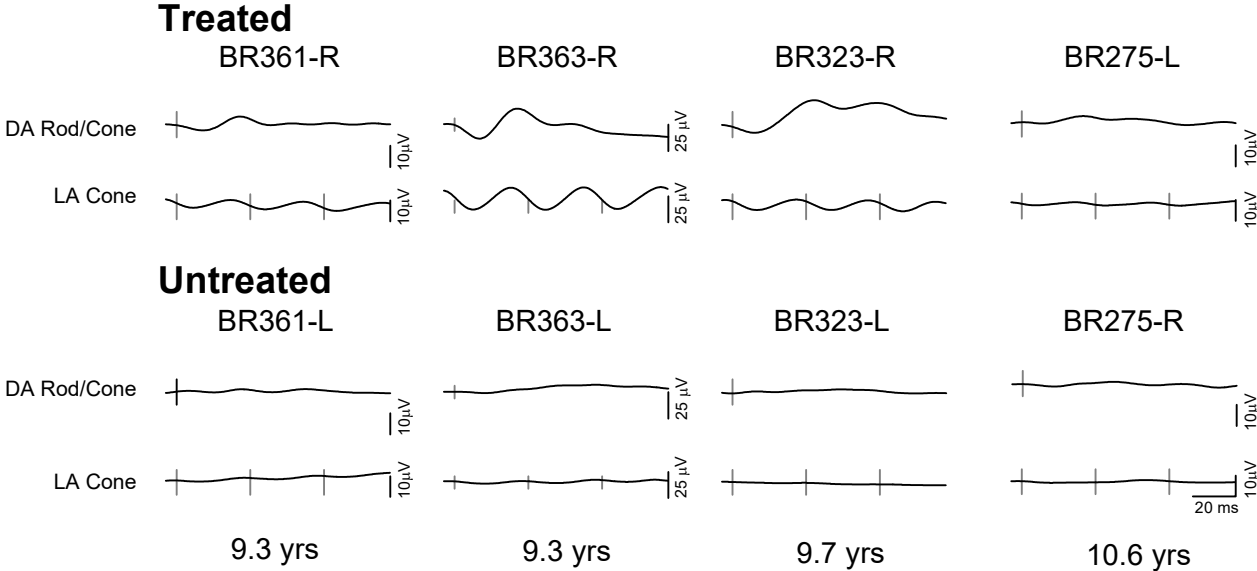

**Supplemental Figure 1.** Illustration of full-field ERGs recorded from the treated and untreated eyes of RPE65-mutant dogs at the end of study. Shown are the dark-adapted mixed rod-cone responses (DA Rod/Cone) and the light-adapted 29Hz flicker responses (LA Cone). In contrast to untreated eyes, at the end of study all treated eyes had distinct ERG responses under dark- and light-adapted conditions. There was, however, variability in the ERG amplitudes among the treated eyes with BR363-R showing the most robust responses, and BR275-L showing the most reduced responses. There were no recordable responses in untreated eyes.

Supplemental Table 1. Experimental animals and procedures used in the study.

| Animal ID             | Gender               | Status   | Tx Age yrs | Vector vol and titer* (dose)                                      | OCT age yrs                                                   | Histopathology (PI interval) yrs |
|-----------------------|----------------------|----------|------------|-------------------------------------------------------------------|---------------------------------------------------------------|----------------------------------|
| BR275                 | Female               | affected |            | OD: --                                                            | 6.4, 7.2, 7.5, 7.9, 8.9, 9.4, 10, 10.6 (OS only; cataract OD) | 10.6 (4)                         |
|                       |                      |          | 6.6        | OS: 190 $\mu$ L; $3.96 \times 10^{11}$ ( $7.5 \times 10^{10}$ vg) |                                                               |                                  |
| BR323                 | Female               | affected | 5.3        | OD: 200 $\mu$ L; $3.96 \times 10^{11}$ ( $7.9 \times 10^{10}$ vg) | 5.1, 5.6, 6.0, 6.3, 7.3, 7.8, 8.4, 9.1, 9.7 (OU)              | 9.9 (4.6)                        |
|                       |                      |          |            | OS: --                                                            |                                                               |                                  |
| BR361                 | Male                 | affected | 4.9        | OD: 160 $\mu$ L; $3.96 \times 10^{11}$ ( $6.3 \times 10^{10}$ vg) | 4.8, 5.2, 5.6, 5.9, 6.9, 7.4, 8.0, 8.7, 9.4 (OU)              | 9.5 (4.6)                        |
|                       |                      |          |            | OS: --                                                            |                                                               |                                  |
| BR363                 | Female               | affected | 4.9        | OD: 200 $\mu$ L; $3.96 \times 10^{11}$ ( $7.9 \times 10^{10}$ vg) | 4.8, 5.2, 5.5, 5.9, 6.9, 7.4, 8.0, 8.7, 9.4 (OU)              | 9.5 (4.6)                        |
|                       |                      |          |            | OS: --                                                            |                                                               |                                  |
| BR304                 | Female               | affected | -          | --                                                                | OU-5.2                                                        | 5.2                              |
| BR318                 | Female               | affected | -          | --                                                                | OU-5.1, 5.2                                                   | 5.2                              |
| BR354                 | Female               | affected | -          | --                                                                | OS-5.0                                                        | -                                |
| CGBCAN, CGBCDI, CGBGS | Male<br>Male<br>Male | WT       | -          | --                                                                | OU-0.7                                                        | -                                |
| X236                  | Female               | WT       | -          | -                                                                 | -                                                             | 8.6                              |
| GSK-1                 | Male                 |          |            |                                                                   |                                                               | 4.3                              |
| GSK2                  | Male                 |          |            |                                                                   |                                                               | 4.3                              |
| D347                  | Male                 |          |            |                                                                   |                                                               | 6.0                              |

\* vector: rAAV2-CMV/CBA-hRPE65; vector titer expressed as vector genomes/mL  
 affected=homozygous for *RPE65* mutation; WT=wildtype control  
 PI=post-injection; OS= left eye; OD=right eye; OU=both eyes
